# Supplementary figures and images for: Manzamine-A Alters In Vitro Calvarial Osteoblast Function
Source: MDPI journal article supplement (doi:10.3390/md20100647), 2022-10-19

Control

2.5  $\mu\text{mol}$

5  $\mu\text{mol}$

72 hrs

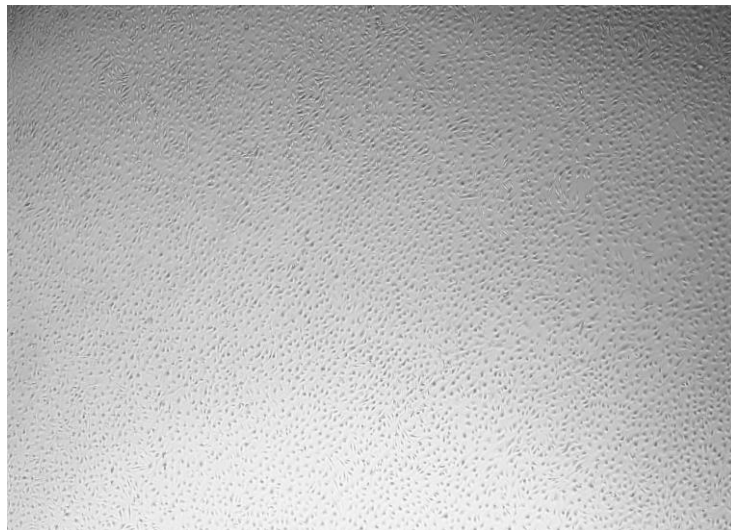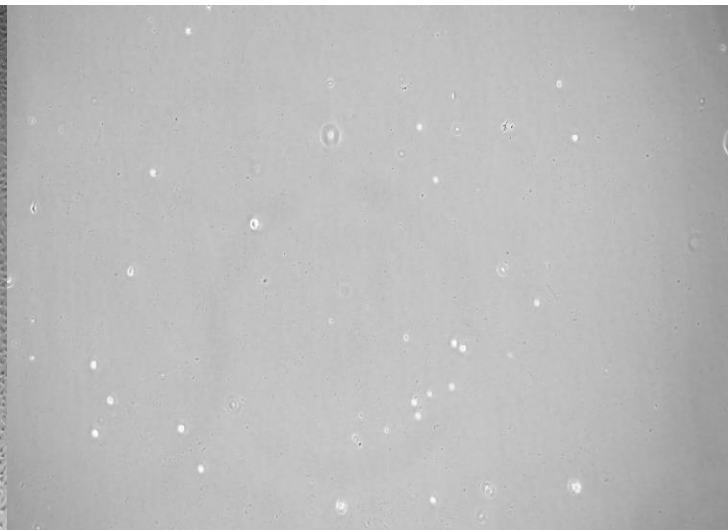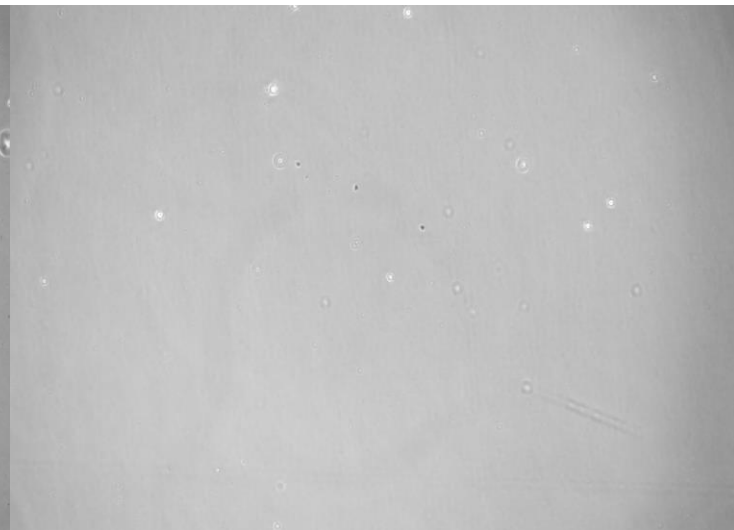

7 days

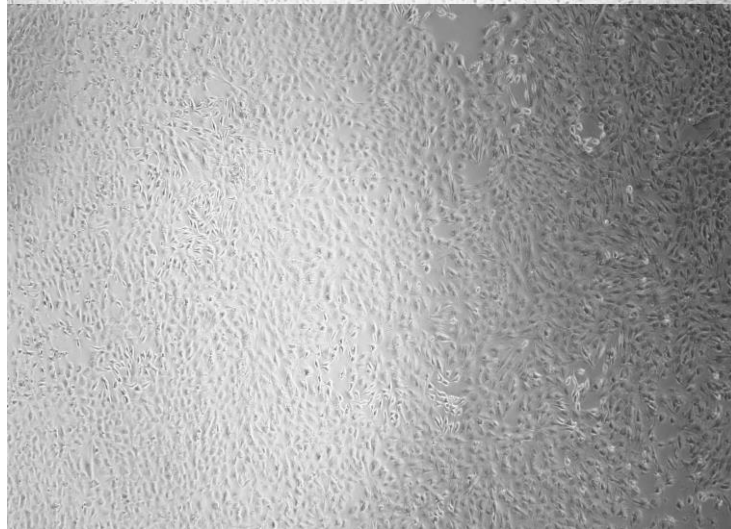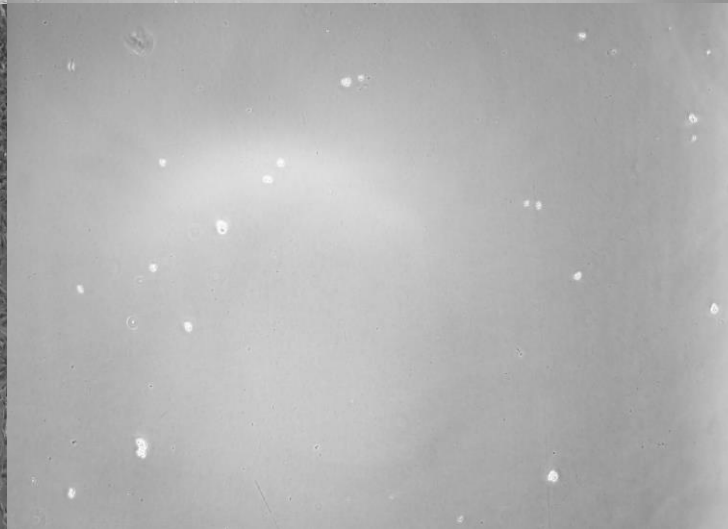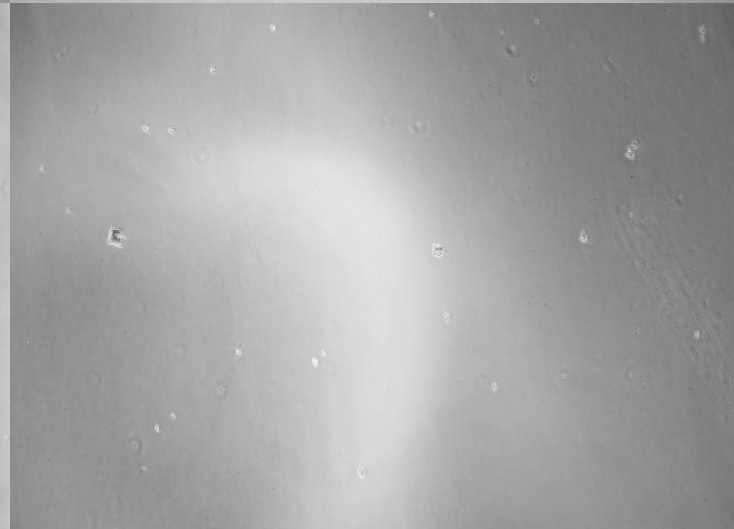

Supplement: s1 [file s1]
